# Supplementary material for: Determining the timing of respiratory syncytial virus (RSV) epidemics: a systematic review, 2016 to 2021; method categorisation and identification of influencing factors
Source: PubMed Central journal article supplement (PMC10835753; doi:10.2807/1560-7917.es.2024.29.5.2300244), 2024-02-01
Supplement: 2300244_SupplementaryMaterial.pdf [file 2300244_SupplementaryMaterial.pdf]

This supplementary material is hosted by Eurosurveillance as supporting information alongside the article “*Determining the timing of respiratory syncytial virus (RSV) epidemics: a systematic review, 2016 to 2021; method categorisation and identification of influencing factors*”, on behalf of the authors, who remain responsible for the accuracy and appropriateness of the content. The same standards for ethics, copyright, attributions and permissions as for the article apply. Supplements are not edited by Eurosurveillance and the journal is not responsible for the maintenance of any links or email addresses provided therein.

## Supplement

### Search terms used in PubMed

((RSV) OR (Respiratory Syncytial Virus) OR 'rsv') AND ((Season\*) OR (Timing) OR (Temporal) OR (Periodicity))

### Search terms used in Embase

('rsv' OR 'respiratory syncytial virus'/exp) AND (season\* OR 'timing'/exp OR temporal OR 'periodicity'/exp)

**Supplement Table 1: study characteristics of included studies categorized by method description.**

| Author, year            | Level    | Country/Region | Subnational | Data collection purpose | Timeframe     | # of cases/% positive | # of gap weeks | Computation method | Year round data collection | Age category | Setting                                     | Case definition | Diagnos-<br>tics | Category               | Method description      | Minimum testing | Start season definition                                                       | End season definition                                      |
|-------------------------|----------|----------------|-------------|-------------------------|---------------|-----------------------|----------------|--------------------|----------------------------|--------------|---------------------------------------------|-----------------|------------------|------------------------|-------------------------|-----------------|-------------------------------------------------------------------------------|------------------------------------------------------------|
| Grilc et al., 2021[1]   | National | Slovenia       | -           | Surveillance            | Retrospective | % positive            | 0              | -                  | Yes                        | All ages     | Hospital data & primary care data           | NA              | PCR              | % positivity threshold | 3% positivity threshold | 20 specimens    | First of 2 consecutive weeks when percentage of tests positive for RSV is >3% | Last week that percentage of tests positive for RSV is >3% |
| Ambrose et al., 2019[2] | National | USA            | -           | Surveillance            | Retrospective | % positive            | NA             | -                  | Yes                        | All ages     | Hospital data (inpatient and/or outpatient) | NA              | PCR              |                        |                         | 11 specimens    |                                                                               |                                                            |
| Midgley et al., 2017[3] | National | USA            | -           | Surveillance            | Retrospective | % positive            | NA             | -                  | NA                         | All ages     | NA                                          | NA              | PCR              |                        |                         | NA              |                                                                               |                                                            |

|                               |             |           |              |              |               |            |    |   |                       |          |                                               |                                 |         |                          |              |                                                                                   |                                                                             |
|-------------------------------|-------------|-----------|--------------|--------------|---------------|------------|----|---|-----------------------|----------|-----------------------------------------------|---------------------------------|---------|--------------------------|--------------|-----------------------------------------------------------------------------------|-----------------------------------------------------------------------------|
| Olajide et al., 2018[4]       | National    | USA       | -            | Surveillance | Retrospective | % positive | NA | - | Yes                   | NA       | Hospital                                      | NA                              | PCR     | 10% positivity threshold | NA           | Last of 2 consecutive weeks when the mean percentage of positive specimens was 3% |                                                                             |
| Grilc et al., 2021[1]         | National    | Slovenia  | -            | Surveillance | Retrospective | % positive | 0  | - | Yes                   | All ages | Hospital data & primary care data             | NA                              | PCR     |                          | 20 specimens | First of 2 consecutive weeks where => 10% of samples tested positive for RSV      | Last of 2 consecutive weeks where => 10% of samples tested positive for RSV |
| Servia-Dopazo et al., 2020[5] | Subnational | Spain     | Galicia      | Surveillance | Retrospective | % positive | NA | - | Yes                   | Children | Hospital: in and outpatient                   | Bronchiolitis                   | Mix     |                          |              |                                                                                   |                                                                             |
| Chadha et al., 2020 [6]       | Regional    | Global    | -            | Surveillance | Retrospective | % positive | 1  | - | Yes (except : Canada) | All ages | Inpatient & Outpatient                        | Extended SARI/ARI               | PCR     |                          |              |                                                                                   |                                                                             |
| Ambrose et al., 2019 [2]      | National    | USA       | -            | Surveillance | Retrospective | % positive | NA | - | Yes                   | All ages | Hospital data (inpatient and/or outpatient ?) | NA                              | Antigen |                          |              |                                                                                   |                                                                             |
| Ambrose et al., 2019 [2]      | National    | USA       | -            | Surveillance | Retrospective | % positive | NA | - | Yes                   | All ages | Hospital data (inpatient and/or outpatient ?) | NA                              | PCR     |                          |              |                                                                                   |                                                                             |
| Ambrose et al., 2019 [2]      | National    | USA       | -            | Surveillance | Retrospective | % positive | NA | - | Yes                   | All ages | Hospital data (inpatient and/or outpatient ?) | NA                              | Mix     |                          |              |                                                                                   |                                                                             |
| Gentile et al., 2019 [7]      | Subnational | Argentina | Buenos Aires | Study        | Retrospective | % positive | NA | - | NA                    | Children | Hospital: Inpatient                           | ALRI acquired in the community  | Mix     |                          |              |                                                                                   |                                                                             |
| Gentile et al., 2020 [8]      | National    | Argentina | -            | Surveillance | Realtime      | % positive | 1  | - | Yes                   | Children | Hospital: Inpatient                           | ALRTI acquired in the community | Mix     |                          |              |                                                                                   |                                                                             |
|                               |             |           |              |              |               |            |    |   |                       |          |                                               |                                 |         | 2 specimens              |              |                                                                                   |                                                                             |

|                                  |             |         |          |                   |               |            |    |                           |     |          |                                                                 |                             |         |                              |              |                                                              |                                                             |  |  |
|----------------------------------|-------------|---------|----------|-------------------|---------------|------------|----|---------------------------|-----|----------|-----------------------------------------------------------------|-----------------------------|---------|------------------------------|--------------|--------------------------------------------------------------|-------------------------------------------------------------|--|--|
| Glick et al., 2017 [9]           | National    | USA     | -        | Surveillance      | Retrospective | % positive | 1  | -                         | No  | All ages | NA                                                              | NA                          | Antigen |                              |              |                                                              |                                                             |  |  |
| Haynes et al., 2016 [10]         | National    | USA     | -        | Surveillance      | Retrospective | % positive | NA | -                         | No  | All ages | Mix                                                             | NA                          | Antigen |                              |              |                                                              |                                                             |  |  |
| Midgley et al., 2017 [3]         | National    | USA     | -        | Surveillance      | Retrospective | % positive | NA | -                         | NA  | All ages | NA                                                              | NA                          | Antigen |                              |              |                                                              |                                                             |  |  |
| Obando-Pacheco et al., 2018 [11] | Regional    | Global  | -        | Review            | Retrospective | % positive | 1  | -                         | NA  | NA       | NA                                                              | NA                          | unknown |                              |              |                                                              |                                                             |  |  |
| Ramaekers et al., 2017 [12]      | Subnational | Belgium | Leuven   | Hospital database | Retrospective | % positive | NA | -                         | Yes | All ages | Hospital: Inpatient                                             | ARI                         | PCR     |                              |              |                                                              |                                                             |  |  |
| Reis et al., 2019 [13]           | National    | USA     | -        | Surveillance      | Prospective   | % positive | NA | -                         | NA  | All ages | NA                                                              | NA                          | Mix     |                              |              |                                                              |                                                             |  |  |
| Reis et al., 2019 [13]           | National    | USA     | -        | Surveillance      | Prospective   | % positive | NA | -                         | NA  | All ages | NA                                                              | NA                          | Mix     |                              |              |                                                              |                                                             |  |  |
| Reis et al., 2019 [13]           | National    | USA     | -        | Surveillance      | Prospective   | % positive | NA | -                         | NA  | All ages | NA                                                              | NA                          | Mix     |                              |              |                                                              |                                                             |  |  |
| Pellegrinelli et al., 2020 [14]  | Subnational | Italy   | Lombardy | Surveillance      | Retrospective | % positive | 1  | -                         | No  | All ages | Ambulatory facilities (pediatricians and general practitioners) | ILI                         | PCR     |                              |              |                                                              |                                                             |  |  |
| Yu et al., 2019 [15]             | Subnational | China   | Beijing  | Study             | Retrospective | % positive | 0  | Logistic regression model | Yes | Children | Hospital: Inpatient                                             | Pneumonia (symptoms listed) | PCR     |                              |              |                                                              |                                                             |  |  |
| Ambrose et al., 2019 [2]         | National    | USA     | -        | Surveillance      | Retrospective | % positive | NA | -                         | Yes | All ages | Hospital data (inpatient and/or outpatient?)                    | NA                          | Mix     | 3 & 10% positivity threshold | 11 specimens | First of 2 consecutive weeks when positivity above threshold | Last of 2 consecutive weeks when positivity above threshold |  |  |

|                              |             |           |                              |              |               |            |    |                       |     |          |                                   |                                                                                                            |         |                           |                         |              |                                                                         |                                                                                                                                                                                        |
|------------------------------|-------------|-----------|------------------------------|--------------|---------------|------------|----|-----------------------|-----|----------|-----------------------------------|------------------------------------------------------------------------------------------------------------|---------|---------------------------|-------------------------|--------------|-------------------------------------------------------------------------|----------------------------------------------------------------------------------------------------------------------------------------------------------------------------------------|
| Grilc et al., 2021[1]        | National    | Slovenia  | -                            | Surveillance | Retrospective | % positive | 0  | -                     | Yes | All ages | Hospital data & primary care data | NA                                                                                                         | PCR     | Mean positivity threshold | 5% positivity threshold | 20 specimens |                                                                         |                                                                                                                                                                                        |
| Grilc et al., 2021 [1]       | National    | Slovenia  | -                            | Surveillance | Retrospective | % positive | 0  | -                     | Yes | All ages | Hospital data & primary care data | NA                                                                                                         | PCR     |                           | 7% positivity threshold | 20 specimens |                                                                         |                                                                                                                                                                                        |
| Baumeister et al., 2019 [16] | National    | Argentina | -                            | Surveillance | Retrospective | % positive | NA | -                     | Yes | All ages | Health Care sites                 | Suspected of respiratory illness (subset uses ILI and SARI others outbreak response and physicians orders) | Antigen | Mean positivity threshold | NA                      | NA           | % positive higher than annual mean percentage for two consecutive weeks | % positive below the annual mean percentage for two consecutive weeks                                                                                                                  |
| Rose et al., 2021 [17]       | Subnational | Kenya     | Siaya, -irobi, Kilifi County | Surveillance | Retrospective | % positive | 2  | 5 week moving average | Yes | All ages | Hospital: inpatient & outpatient  | Mix (ILI, ALRI, SARI)                                                                                      | Mix     |                           |                         | NA           | NA                                                                      | The first of 3 consecutive weeks during which the moving average percentage positive was greater than the mean of the 5 week moving average percentage positive for that calendar year |

|                          |          |              |   |                   |               |            |    |                       |     |          |                                  |                                                              |     |                                       |                     |    |                                                                                                            |                                                                                                            |
|--------------------------|----------|--------------|---|-------------------|---------------|------------|----|-----------------------|-----|----------|----------------------------------|--------------------------------------------------------------|-----|---------------------------------------|---------------------|----|------------------------------------------------------------------------------------------------------------|------------------------------------------------------------------------------------------------------------|
| Chi et al., 2018[18]     | National | Taiwan       | - | Claims database   | Retrospective | % positive | NA | -                     | Yes | Children | Hospital admissions              | ICD codes for RSV                                            | NA  | <b>Number of detections threshold</b> |                     | NA | The RSV season was defined as RSV rate in two or more consecutive months that was above the baseline rate. | The RSV season was defined as RSV rate in two or more consecutive months that was above the baseline rate. |
| Midgley et al., 2017 [3] | National | USA          | - | Surveillance      | Retrospective | # of cases | NA | 4 week moving average | NA  | All ages | NA                               | NA                                                           | PCR |                                       | 10-fold baseline    | NA | First of 2 consecutive weeks when RSV detections are >10 times the pre-season baseline                     | Last week when RSV detections are >10 times the pre-season baseline                                        |
| Vos et al., 2019 [19]    | National | Netherlands  | - | Surveillance      | Retrospective | # of cases | NA | -                     | Yes | All ages | GP, hospital, outpatient clinics | ILI in primary care and unknown for virological surveillance | PCR |                                       | # of case threshold | NA | First week when more than 20 detections are registered                                                     | Last week when more than 20 detections were registered                                                     |
| Baker et al., 2019 [20]  | National | USA & Mexico | - | Hospital database | Retrospective | incidence  | NA | Transmission model    | NA  | NA       | Hospital: Inpatient              | ICD-9 codes RSV                                              | NA  |                                       |                     | NA | Normalized incidence (based on the mean over several years) exceeds 0.2                                    | NA                                                                                                         |

|                            |             |             |      |              |               |                 |    |                       |     |          |                                   |                                                              |     |                               |                                   |                                                                                                                                                     |                                                                                                    |    |  |  |
|----------------------------|-------------|-------------|------|--------------|---------------|-----------------|----|-----------------------|-----|----------|-----------------------------------|--------------------------------------------------------------|-----|-------------------------------|-----------------------------------|-----------------------------------------------------------------------------------------------------------------------------------------------------|----------------------------------------------------------------------------------------------------|----|--|--|
| Rose et al., 2018 [21]     | National    | USA         | -    | Surveillance | Retrospective | # of cases      | 0  | 5 week moving average | Yes | NA       | Mix                               | NA                                                           | PCR | Retrospective slope 10 (RS10) | NA                                | The 2nd of 2 consecutive weeks when the slope exceeded 10 normalized detections per week (provided that the slope exceed 10 from that week forward) | Last week that normalized detections per week exceeded 10                                          |    |  |  |
| Midgley et al., 2017 [3]   | National    | USA         | -    | Surveillance | Retrospective | # of cases      | NA |                       | NA  | All ages | NA                                | NA                                                           | PCR |                               | NA                                |                                                                                                                                                     |                                                                                                    |    |  |  |
| Grilc et al., 2021 [1]     | National    | Slovenia    | -    | Surveillance | Retrospective | % positive      | 0  | -                     | Yes | All ages | Hospital data & primary care data | NA                                                           | PCR | Moving epidemic Method (MEM)  | NA                                | First week when curve exceeds the epidemic threshold (based on historical surveillance data)                                                        | First week when curve is below the post-epidemic threshold (based on historical surveillance data) |    |  |  |
| Harcourt et al., 2019 [22] | National    | England     | -    | Surveillance | Realtime      | % consultations | 0  | 7 day moving average  | Yes | Children | GP out of hours and NHS 111 calls | syndromic indicators (cough or bronchitis)                   | NA  |                               |                                   |                                                                                                                                                     |                                                                                                    | NA |  |  |
| Vos et al., 2019 [19]      | National    | Netherlands | -    | Surveillance | Retrospective | # of cases      | NA | -                     | Yes | All ages | GP, hospital, outpatient clinics  | ILI in primary care and unknown for virological surveillance | PCR |                               |                                   |                                                                                                                                                     |                                                                                                    |    |  |  |
| Callahan et al., 2020 [23] | Subnational | USA         | Utah | Surveillance | Retrospective | # of cases      | NA | Wavelet transform     | Yes | NA       | Hospital & clinics                | NA                                                           | Mix | Change point analysis         | NA                                | No formal definition, modelled via change point analysis                                                                                            | No formal definition, modelled via change point analysis                                           |    |  |  |
| Broberg et al., 2018 [24]  | Regional    | Europe      | -    | Surveillance | Retrospective | # of cases      | 1  | -                     | NA  | NA       | NA                                | Mix (ILI, ARI, diagnostic need)                              | Mix | % of cases                    | 1.2% of total detections (weekly) | First week RSV detections exceed 1.2%                                                                                                               | Last week RSV detections exceed 1.2%                                                               |    |  |  |

|                              |             |             |                                          |              |               |            |    |   |     |          |                                   |                                                              |     |  |  |  |  |  |  |                                                                    |    |                                                                                    |                                                                    |
|------------------------------|-------------|-------------|------------------------------------------|--------------|---------------|------------|----|---|-----|----------|-----------------------------------|--------------------------------------------------------------|-----|--|--|--|--|--|--|--------------------------------------------------------------------|----|------------------------------------------------------------------------------------|--------------------------------------------------------------------|
| Grilc et al., 2021 [1]       | National    | Slovenia    | -                                        | Surveillance | Retrospective | # of cases | 1  | - | Yes | All ages | Hospital data & primary care data | NA                                                           | PCR |  |  |  |  |  |  |                                                                    |    |                                                                                    |                                                                    |
| Vos et al., 2019 [19]        | National    | Netherlands | -                                        | Surveillance | Retrospective | # of cases | NA | - | Yes | All ages | GP, hospital, outpatient clinics  | ILI in primary care and unknown for virological surveillance | PCR |  |  |  |  |  |  |                                                                    |    |                                                                                    |                                                                    |
| Broberg et al., 2016 [25]    | Regional    | Europe      | -                                        | Surveillance | Retrospective | # of cases | NA | - | NA  | NA       | primary care and hospital care    | NA                                                           | NA  |  |  |  |  |  |  | 5% of total detections (weekly)                                    | NA | First week when the number of detections exceeds 5% of total detections            | First week when detections no longer exceed 5% of total detections |
| Paz-Bailey et al., 2018 [26] | Subnational | Puerto Rico | Ponce and Guayama (Southern Puerto Rico) | Surveillance | Retrospective | # of cases | NA | - | NA  | NA       | Emergency department              | onset of fever ≤7 days of presentation                       | PCR |  |  |  |  |  |  | 10% of total detections (monthly)                                  | NA | Month containing 10% of total annual cases for 2 years or more                     | -                                                                  |
| Shapiro et al., 2017 [27]    | Subnational | Sri Lanka   | Southern Sri Lanka                       | Study        | Retrospective | # of cases | NA | - | Yes | All ages | Hospital: outpatient              | ILI                                                          | PCR |  |  |  |  |  |  |                                                                    | NA | The monthly proportion being => 10% of total cases                                 | The monthly proportion being => 10% of total cases                 |
| Wrotek et al., 2020 [28]     | Subnational | Poland      | Warsaw                                   | Study        | Retrospective | # of cases | NA | - | Yes | Children | Hospital: Inpatient               | Sings and symptoms indicating the involvement of the lower   | PCR |  |  |  |  |  |  | 2% of total detections (weekly)/8.5% of total detections (monthly) | NA | Epidemic week => 2% of total RSV cases, epidemic month => 8.5% of total RSV cases. | NA                                                                 |

|                                    |             |           |              |                   |               |                       |    |   |     |          |                                             | respiratory tract |     |                                  |                                        |     |                                                                                                                       |                                                                                                                 |
|------------------------------------|-------------|-----------|--------------|-------------------|---------------|-----------------------|----|---|-----|----------|---------------------------------------------|-------------------|-----|----------------------------------|----------------------------------------|-----|-----------------------------------------------------------------------------------------------------------------------|-----------------------------------------------------------------------------------------------------------------|
| Montgomery et al., 2021[29]        | Subnational | USA       | Hawaii       | Hospital database | Retrospective | # of cases            | NA | - | Yes | Children | NA                                          | NA                | Mix | <b>Mean detections threshold</b> | Mean threshold                         | NA  | Above the average monthly number of cases                                                                             | Above the average monthly number of cases                                                                       |
| Glatman-Freedman et al., 2020 [30] | National    | Israel    | -            | Hospital database | Retrospective | # of hospitalizations | NA | - | Yes | Children | Hospital: Inpatient                         | ICD codes for RSV | NA  |                                  | Mean plus 2SD                          | NA  | Number of monthly hospitalizations exceeds the baseline (mean) plus 2SD                                               | Number of monthly hospitalizations falls below baseline (mean) +2SD                                             |
| Ferrero et al., 2016 [31]          | Subnational | Argentina | Buenos Aires | Hospital database | Retrospective | # of cases            | 0  | - | Yes | Children | Hospital data (inpatient and/or outpatient) | NA                | NA  |                                  | 60% threshold                          | NA  | First week when the number of RSV cases identified is above 60% from the average weekly identifications for that year | The first week when the number of RSV cases identified is below 60% from the average weekly cases for that year |
| Grilc et al., 2021 [1]             | National    | Slovenia  | -            | Surveillance      | Retrospective | # of cases            | 0  | - | Yes | All ages | Hospital data & primary care data           | NA                | PCR |                                  |                                        | NA  |                                                                                                                       |                                                                                                                 |
| Li et al., 2019 [32]               | Regional    | Global    | -            | Review            | Retrospective | # of cases            | 0  | - | NA  | NA       | NA                                          | NA                | NA  |                                  | <b>Average Annual Percentage (AAP)</b> | AAP | NA                                                                                                                    | First month of the longest consecutive months to be included in the sorted AAP 75%                              |



## Bibliography

1. Grilc E, Prosenč Trilar K, Lajovic J, Sočan M. Determining the seasonality of respiratory syncytial virus in Slovenia. *Influenza Other Respir Viruses*. 2021;15(1):56-63. <http://dx.doi.org/10.1111/irv.12779> PMID:32656961
2. Ambrose CS, Steed LL, Brandon M, Frye K, Olajide IR, Thomson G. National and regional modeling of distinct RSV seasonality thresholds for antigen and PCR testing in the United States. *J Clin Virol*. 2019;120:68-77. <http://dx.doi.org/10.1016/j.jcv.2019.09.010> PMID:31590113
3. Midgley CM, Haynes AK, Baumgardner JL, Chommanard C, Demas SW, Prill MM, et al. Determining the seasonality of respiratory syncytial virus in the United States: The impact of increased molecular testing. *J Infect Dis*. 2017;216(3):345-55. <http://dx.doi.org/10.1093/infdis/jix275> PMID:28859428
4. Olajide I, Ambrose C, Dube C. New method for determining respiratory syncytial virus seasonality in the united states: Results from RSV alert, a hospital-based laboratory surveillance program. *J Manag Care Spec Pharm* . 2018;24(10 A):S67.
5. Servia-Dopazo M, Purriños-Hermida MJ, Pérez S, García J, Malvar-Pintos A, et al. [Usefulness of the microbiological surveillance of respiratory syncytial virus in Galicia (Spain): 2008-2017]. *Gac Sanit*. 2020;34(5):474-9. <http://dx.doi.org/10.1016/j.gaceta.2018.11.009> PMID:30737055

6. Chadha M, Hirve S, Bancej C, Barr I, Baumeister E, Caetano B, et al.; WHO RSV Surveillance Group. Human respiratory syncytial virus and influenza seasonality patterns-Early findings from the WHO global respiratory syncytial virus surveillance. *Influenza Other Respir Viruses*. 2020;14(6):638-46. <http://dx.doi.org/10.1111/irv.12726> PMID:32163226
7. Gentile A, Lucion MF, Juarez MDV, Areso MS, Bakir J, Viegas M, et al. Burden of Respiratory Syncytial Virus Disease and Mortality Risk Factors in Argentina: 18 Years of Active Surveillance in a Children's Hospital. *Pediatr Infect Dis J*. 2019;38(6):589-94. <http://dx.doi.org/10.1097/INF.0000000000002271> PMID:30672892
8. Gentile Á, Lucion MF, Juárez MDV, Castellano V, Bakir J, Pacchiotti A, et al. Virus sincicial respiratorio en niños nacidos prematuros: 19 años de vigilancia epidemiológica activa en un hospital pediátrico. [Respiratory syncytial virus in preterm infants: 19 years of active epidemiological surveillance in a children's hospital]. *Arch Argent Pediatr*. 2020;118(6):386-92. PMID:33231045
9. Glick AF, Kjelleren S, Hofstetter AM, Subramony A. RSV Hospitalizations in Comparison With Regional RSV Activity and Inpatient Palivizumab Administration, 2010-2013. *Hosp Pediatr*. 2017;7(5):271-8. <http://dx.doi.org/10.1542/hpeds.2016-0124> PMID:28381595
10. Haynes AK, Fowlkes AL, Schneider E, Mutuc JD, Armstrong GL, Gerber SI. Human Metapneumovirus Circulation in the United States, 2008 to 2014. *Pediatrics*. 2016;137(5):e20152927. <http://dx.doi.org/10.1542/peds.2015-2927> PMID:27244790
11. Obando-Pacheco P, Justicia-Grande AJ, Rivero-Calle I, Rodríguez-Tenreiro C, Sly P, Ramilo O, et al. Respiratory Syncytial Virus Seasonality: A Global Overview. *J Infect Dis*. 2018;217(9):1356-64. <http://dx.doi.org/10.1093/infdis/jiy056> PMID:29390105
12. Ramaekers K, Keyaerts E, Rector A, Borremans A, Beuselinck K, Lagrou K, et al. Prevalence and seasonality of six respiratory viruses during five consecutive epidemic seasons in Belgium. *J Clin Virol*. 2017;94:72-8. <http://dx.doi.org/10.1016/j.jcv.2017.07.011> PMID:28772168
13. Reis J, Yamana T, Kandula S, Shaman J. Superensemble forecast of respiratory syncytial virus outbreaks at national, regional, and state levels in the United States. *Epidemics*. 2019;26:1-8. <http://dx.doi.org/10.1016/j.epidem.2018.07.001> PMID:30025885
14. Pellegrinelli L, Galli C, Bubba L, Cereda D, Anselmi G, Binda S, et al. Respiratory syncytial virus in influenza-like illness cases: Epidemiology and molecular analyses of four consecutive winter seasons (2014-2015/2017-2018) in Lombardy (Northern Italy). *J Med Virol*. 2020;92(12):2999-3006. <http://dx.doi.org/10.1002/jmv.25917> PMID:32314816
15. Yu J, Liu C, Xiao Y, Xiang Z, Zhou H, Chen L, et al. Respiratory Syncytial Virus Seasonality, Beijing, China, 2007-2015. *Emerg Infect Dis*. 2019;25(6):1127-35. <http://dx.doi.org/10.3201/eid2506.180532> PMID:31107230
16. Baumeister E, Duque J, Varela T, Palekar R, Couto P, Savy V, et al. Timing of respiratory syncytial virus and influenza epidemic activity in five regions of Argentina, 2007-2016. *Influenza Other Respir Viruses*. 2019;13(1):10-7. <http://dx.doi.org/10.1111/irv.12596> PMID:30051595
17. Rose EB, Nyawanda BO, Munywoki PK, Murunga N, Bigogo GM, Otieno NA, et al. Respiratory syncytial virus seasonality in three epidemiological zones of Kenya. *Influenza Other Respir Viruses*. 2021;15(2):195-201. <http://dx.doi.org/10.1111/irv.12810> PMID:33305543

18. Chi H, Chung C-H, Lin Y-J, Lin C-H. Seasonal peaks and risk factors of respiratory syncytial virus infections related hospitalization of preterm infants in Taiwan. *PLoS One*. 2018;13(5):e0197410. <http://dx.doi.org/10.1371/journal.pone.0197410> PMID:29746578
19. Vos LM, Teirlinck AC, Lozano JE, Vega T, Donker GA, Hoepelman AI, et al. Use of the moving epidemic method (MEM) to assess national surveillance data for respiratory syncytial virus (RSV) in the Netherlands, 2005 to 2017. *Euro Surveill*. 2019;24(20):1800469. <http://dx.doi.org/10.2807/1560-7917.ES.2019.24.20.1800469> PMID:31115311
20. Baker RE, Mahmud AS, Wagner CE, Yang W, Pitzer VE, Viboud C, et al. Epidemic dynamics of respiratory syncytial virus in current and future climates. *Nat Commun*. 2019;10(1):5512. <http://dx.doi.org/10.1038/s41467-019-13562-y> PMID:31797866
21. Rose EB, Wheatley A, Langley G, Gerber S, Haynes A. Respiratory Syncytial Virus Seasonality - United States, 2014-2017. *MMWR Morb Mortal Wkly Rep*. 2018;67(2):71-6. <http://dx.doi.org/10.15585/mmwr.mm6702a4> PMID:29346336
22. Harcourt SE, Morbey RA, Smith GE, Loveridge P, Green HK, Pebody R, et al. Developing influenza and respiratory syncytial virus activity thresholds for syndromic surveillance in England. *Epidemiol Infect*. 2019;147:e163. <http://dx.doi.org/10.1017/S0950268819000542> PMID:31063101
23. Callahan ZY, Smith TK, Ingersoll C, Gardner R, Korgenski EK, Sloan CD. Comparative Seasonal Respiratory Virus Epidemic Timing in Utah. *Viruses*. 2020;12(3):275. <http://dx.doi.org/10.3390/v12030275> PMID:32121465
24. Broberg EK, Waris M, Johansen K, Snacken R, Penttinen P, Trebbien R, et al.; European Influenza Surveillance Network. Seasonality and geographical spread of respiratory syncytial virus epidemics in 15 European countries, 2010 to 2016. *Euro Surveill*. 2018;23(5):17-00284. <http://dx.doi.org/10.2807/1560-7917.ES.2018.23.5.17-00284> PMID:29409569
25. Broberg E, Johansen K, Adlhoch C, Snacken R, Penttinen P. Seasonality of respiratory syncytial virus infection in the EU/EEA, 2010-2016. *J Clin Virol*. 2016;82:S116-7. <http://dx.doi.org/10.1016/j.jcv.2016.08.234>
26. Paz-Bailey G, Adams L, Munoz J, Lozier M, Olsen S, Blanton L, et al. Trends in influenza and other respiratory viruses in Southern Puerto Rico, 2012-2017. *Am J Trop Med Hyg*. 2018;99(4):524.
27. Shapiro D, Bodinayake CK, Nagahawatte A, Devasiri V, Kurukulasooriya R, Hsiang J, et al. Burden and Seasonality of Viral Acute Respiratory Tract Infections among Outpatients in Southern Sri Lanka. *Am J Trop Med Hyg*. 2017;97(1):88-96. <http://dx.doi.org/10.4269/ajtmh.17-0032> PMID:28719323
28. Wrotek A, Czajkowska M, Jackowska T. Seasonality of Respiratory Syncytial Virus Hospitalization. *Adv Exp Med Biol*. 2020;1279:93-100. [http://dx.doi.org/10.1007/5584\\_2020\\_503](http://dx.doi.org/10.1007/5584_2020_503) PMID:32170670
29. Montgomery AS, Lustik MB, Jones MU, Horseman TS. Respiratory Viral Pathogens in Children Evaluated at Military Treatment Facilities in Oahu, Hawaii From 2014 to 2018: Seasonality and Climatic Factors. *J Pediatric Infect Dis Soc*. 2021;10(4):517-20. <http://dx.doi.org/10.1093/jpids/piaa131> PMID:33219667
30. Glatman-Freedman A, Kaufman Z, Applbaum Y, Dichtiar R, Steiman A, Gordon E-S, et al. Respiratory Syncytial Virus hospitalization burden: a nation-wide population-based analysis, 2000-2017. *J Infect*. 2020;81(2):297-303. <http://dx.doi.org/10.1016/j.jinf.2020.05.078> PMID:32504738

31. Ferrero F, Torres F, Abrutzky R, Ossorio MF, Marcos A, Ferrario C, et al. Seasonality of respiratory syncytial virus in Buenos Aires. Relationship with global climate change. *Arch Argent Pediatr*. 2016;114(1):52-5. PMID:26914075
32. Li Y, Wang X, Blau DM, Caballero MT, Feikin DR, Gill CJ, et al.; Respiratory Virus Global Epidemiology Network; RESCEU investigators. Global, regional, and national disease burden estimates of acute lower respiratory infections due to respiratory syncytial virus in children younger than 5 years in 2019: a systematic analysis. *Lancet*. 2022;399(10340):2047-64. [http://dx.doi.org/10.1016/S0140-6736\(22\)00478-0](http://dx.doi.org/10.1016/S0140-6736(22)00478-0) PMID:35598608
